# Supplementary material for: In Vitro Bioeffects of Polyelectrolyte Multilayer Microcapsules Post-Loaded with Water-Soluble Cationic Photosensitizer
Source: PubMed Central journal article supplement (PMC7408512; doi:10.3390/pharmaceutics12070610), 2020-06-30
Supplement: pharmaceutics-12-00610-s001.pdf [file pharmaceutics-12-00610-s001.pdf]

# **Supplementary Materials: In Vitro Bioeffect of Polyelectrolyte Multilayer Microcapsules Post-Loaded with Water-Soluble Cationic Photosensitizer**

Alexey V. Ermakov, Roman A. Verkhovskii, Irina V. Babushkina, Daria B. Trushina, Olga A. Inozemtseva, Evgeny A. Lukyanets, Vladimir J. Ulyanov, Dmitry A. Gorin, Sergei Belyakov and Maria N. Antipina

## 1. Temperature-induced morphological changes in the [DS/PAGr]<sub>4</sub> PMC system

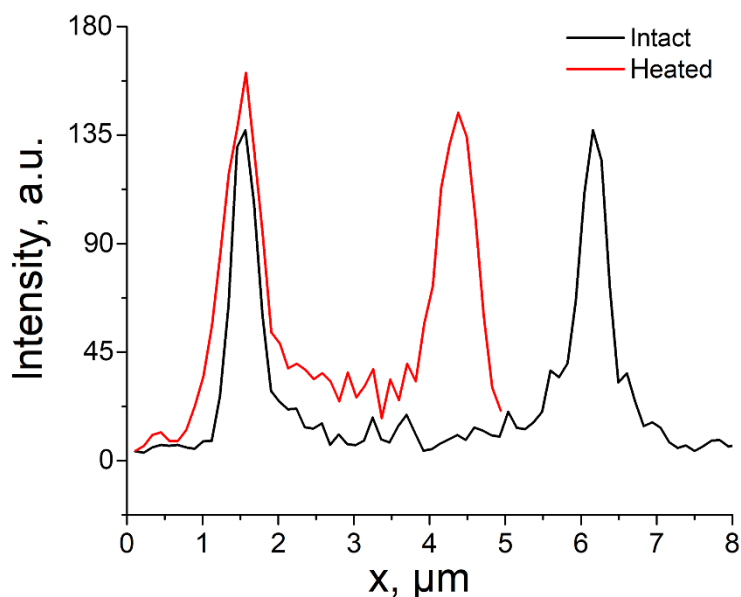

**Figure S1.** Fluorescence intensity cross-section profiles of the intact and heated capsules labeled with RhD6G ( $\lambda_{\text{ex}}=525 \text{ nm}$ ,  $\lambda_{\text{em}}=548 \text{ nm}$ ). The corresponding image was captured on the focal plane, allowing to visualize the maximum distance between two antipodal points on their surfaces. The capsule diameter is measured as a distance between the positions of maximums of two peaks.

## 2. Optical properties of Cholosens

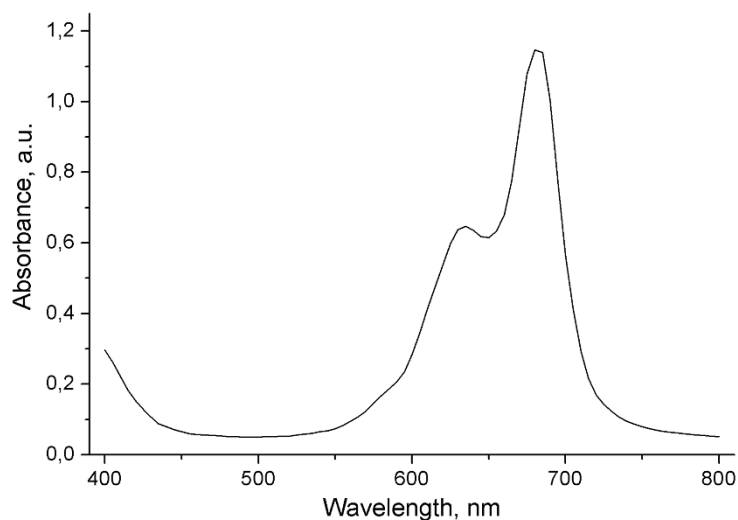

**Figure S2.** The absorbance spectrum of Cholosens. The spectrum was obtained in Di water (18.2  $\text{M}\Omega\text{cm}^{-1}$ ) at pH 6.6. Before measurements, the capsules were thoroughly washed via three sequential centrifugation steps, each followed by the exchanging of the supernatant.

## 3. Loading of Cholosens in PMC: loading data based on the analysis of enzymatically degraded capsules.

Samples of lyophilized Cholosens-loaded capsules loaded as displayed in Figure 3 were each mixed with 1 mL of 1 mg/mL  $\alpha$ -chymotrypsin dissolved in 1 $\times$  PBS (pH 7.4) in 2 mL centrifuge tubes and kept at 37  $^{\circ}\text{C}$  for 24 hours. Undissolved polymeric complexes were then extracted by centrifugation and resuspended again in the enzyme solution. The respective supernatants were then analyzed with fluorescence spectroscopy to determine the amount of Cholosens released from the capsules after the complete digestion of the PMC. The respective measured released data and calculated loading of Cholosens per a single capsule are shown in Figure S3.

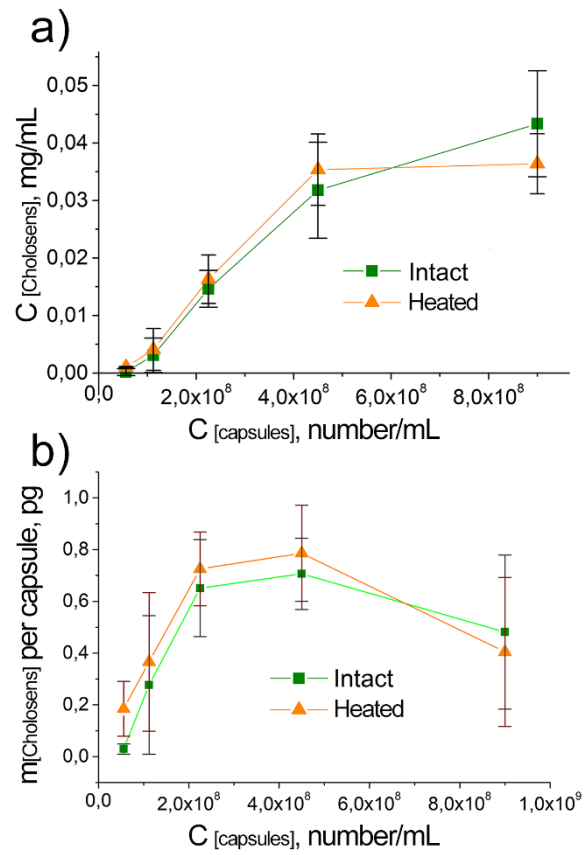

**Figure S3.** Loading of Cholosen in [DS/PArg]<sub>4</sub> microcapsules with and without heat treatment (80 °C, 60 min) depending on the capsule concentration: (a) spectroscopically measured concentration of Cholosen in the supernatant after the capsule enzymatic degradation; (b) calculated amount of Cholosen in pg released from a single capsule.

### 3. Student's test results

#### 3.1. Student's test results for the cellular uptake of [DS/PArg]<sub>4</sub> microcapsules by HeLa cells (Figure 6 a)

The number of measurements was 3 for all uptake experiments; a p-value < 0.05 was considered statistically significant. Determination of the statistical significance of the differences between cellular uptake of the intact and heated PMC is presented in Table S1.

**Table S1.** Flow cytometry data on the capsules internalization by HeLa cells and calculated t parameter (n.s. means non-significant).

| Time of incubation, h | Cells with Intact microcapsules, % | Cells with Heated microcapsules, % | t      | degrees of freedom, df | t crit (* p<0.05) | result |
|-----------------------|------------------------------------|------------------------------------|--------|------------------------|-------------------|--------|
| 1                     | 32±3.5                             | 42.6±4.4                           | 3.2655 | 4                      | 2.7764            | *      |
| 2                     | 41.5±5.2                           | 52±3                               | 3.0294 |                        |                   | *      |
| 4                     | 55±6                               | 57.8±3.9                           | 0.6777 |                        |                   | n.s.   |
| 24                    | 78.3±7.2                           | 81.8±5.9                           | 0.6512 |                        |                   | n.s.   |

#### 2.2. Student's test results for light and dark viability of HeLa and NHDF cells in the presence of free and encapsulated forms of Cholosens (Figure 7)

**Table S2.** Viability of HeLa and NHDF after treatment with 1 or 5 capsules per cell after irradiation (information for Fig.7b). Each point indicates the mean± (n=6).

| <i>HeLa, 1 capsules/cell</i>     |                                   |         |    |                   |                    |        |
|----------------------------------|-----------------------------------|---------|----|-------------------|--------------------|--------|
| With heated capsules, irradiated | In Cholosens solution, irradiated | t       | df | t crit (* p<0.05) | t crit (** p<0.01) | result |
| 39.76±0.77                       | 33.94±0.72                        | 13.5233 | 10 | 2.2281            | 3.1693             | **     |
| With intact capsules, irradiated |                                   | 8.0051  |    |                   |                    | **     |
| 39.26±1.46                       |                                   |         |    |                   |                    |        |
| <i>HeLa, 5 capsules/cell</i>     |                                   |         |    |                   |                    |        |
| With heated capsules, irradiated | In Cholosens solution, irradiated | t       | df | t crit (* p<0.05) | t crit (** p<0.01) | result |
| 10.79±2.16                       | 4.47±1.18                         | 6.2897  |    |                   |                    | **     |
| With intact capsules, irradiated |                                   | 1.0544  |    |                   |                    | n.s.   |
| 5.02±0.49                        |                                   |         |    |                   |                    |        |
| <i>NHDF, 1 capsules/cell</i>     |                                   |         |    |                   |                    |        |
| With heated capsules, irradiated | In Cholosens solution, irradiated | t       | df | t crit (* p<0.05) | t crit (** p<0.01) | result |
| 39.00±0.92                       | 32.14±0.72                        | 14.3835 |    |                   |                    | **     |
| With intact capsules, irradiated |                                   | 10.3637 |    |                   |                    | **     |
| 38.28±1.26                       |                                   |         |    |                   |                    |        |
| <i>NHDF, 5 capsules/cell</i>     |                                   |         |    |                   |                    |        |
| With heated capsules, irradiated | In Cholosens solution, irradiated | t       | df | t crit (* p<0.05) | t crit (** p<0.01) | result |
| 4.62±0.06                        | 3.02±0.32                         | 12.0377 |    |                   |                    | **     |
| With intact capsules, irradiated |                                   | 3.2268  |    |                   |                    | **     |
| 4.07±0.73                        |                                   |         |    |                   |                    |        |



|                                                 |                                                 |          |           |  |  |      |
|-------------------------------------------------|-------------------------------------------------|----------|-----------|--|--|------|
| 2.58±0.10                                       | 2.88±0.08                                       | 5.7382   |           |  |  |      |
| <b>With heated capsules,<br/>non-irradiated</b> | <b>With intact capsules,<br/>non-irradiated</b> | 0.2968   |           |  |  | n.s. |
| 111.10±9.28                                     | 108.92±15.41                                    |          |           |  |  |      |
| <i>HeLa, 40 capsules/cell</i>                   |                                                 |          |           |  |  |      |
| <b>With heated capsules,<br/>irradiated</b>     | <b>With intact capsules,<br/>irradiated</b>     | <b>t</b> |           |  |  | n.s. |
| 2.86±0.04                                       | 3.03±0.53                                       | 0.7835   |           |  |  |      |
| <b>With heated capsules,<br/>non-irradiated</b> | <b>With intact capsules,<br/>non-irradiated</b> | 1.9649   |           |  |  | n.s. |
| 95.90±9.34                                      | 104.84±6.08                                     |          |           |  |  |      |
| <i>HeLa, 80 capsules/cell</i>                   |                                                 |          |           |  |  |      |
| <b>With heated capsules,<br/>irradiated</b>     | <b>With intact capsules,<br/>irradiated</b>     | <b>t</b> |           |  |  | n.s. |
| 2.99±0.12                                       | 2.92±0.28                                       | 0.5629   |           |  |  |      |
| <b>With heated capsules,<br/>non-irradiated</b> | <b>With intact capsules,<br/>non-irradiated</b> | 0.9140   |           |  |  | n.s. |
| 107.82±0.71                                     | 104.76±8.17                                     |          |           |  |  |      |
| <i>NHDF, 1 capsules/cell</i>                    |                                                 |          |           |  |  |      |
| <b>With heated capsules,<br/>irradiated</b>     | <b>With intact capsules,<br/>irradiated</b>     | <b>t</b> | <b>df</b> |  |  | n.s. |
| 39,00±0,92                                      | 38,28±1,26                                      | 1.1304   | 10        |  |  |      |
| <b>With heated capsules,<br/>non-irradiated</b> | <b>With intact capsules,<br/>non-irradiated</b> | 1.0333   |           |  |  | n.s. |
| 87,96±3,51                                      | 89,87±2,86                                      |          |           |  |  |      |
| <i>NHDF, 5 capsules/cell</i>                    |                                                 |          |           |  |  |      |
| <b>With heated capsules,<br/>irradiated</b>     | <b>With intact capsules,<br/>irradiated</b>     | <b>t</b> | <b>df</b> |  |  | n.s. |
| 4,62±0,06                                       | 4,07±0,73                                       | 1.8393   | 10        |  |  |      |
| <b>With heated capsules,<br/>non-irradiated</b> | <b>With intact capsules,<br/>non-irradiated</b> | 2.5310   |           |  |  | *    |
| 65,16±13,51                                     | 79,57±3,46                                      |          |           |  |  |      |
| <i>NHDF, 20 capsules/cell</i>                   |                                                 |          |           |  |  |      |
| <b>With heated capsules,<br/>irradiated</b>     | <b>With intact capsules,<br/>irradiated</b>     | <b>t</b> | <b>df</b> |  |  | n.s. |
| 2,52±0,40                                       | 2,54±0,31                                       | 0.0968   | 10        |  |  |      |
| <b>With heated capsules,<br/>non-irradiated</b> | <b>With intact capsules,<br/>non-irradiated</b> | 3.2666   |           |  |  | **   |
| 66,51±16,93                                     | 42,33±6,49                                      |          |           |  |  |      |
| <i>NHDF, 40 capsules/cell</i>                   |                                                 |          |           |  |  |      |
| <b>With heated capsules,<br/>irradiated</b>     | <b>With intact capsules,<br/>irradiated</b>     | <b>t</b> | <b>df</b> |  |  | n.s. |
| 2,43±0,03                                       | 2,50±0,35                                       | 0.4881   | 10        |  |  |      |
| <b>With heated capsules,<br/>non-irradiated</b> | <b>With intact capsules,<br/>non-irradiated</b> | 1.1925   |           |  |  | n.s. |
| 33,06±3,98                                      | 38,16±9,69                                      |          |           |  |  |      |
| <i>NHDF, 80 capsules/cell</i>                   |                                                 |          |           |  |  |      |
| <b>With heated capsules,<br/>irradiated</b>     | <b>With intact capsules,<br/>irradiated</b>     | <b>t</b> | <b>df</b> |  |  | **   |
| 2,69±0,16                                       | 2,45±0,05                                       | 3.5070   | 10        |  |  |      |
| <b>With heated capsules,<br/>non-irradiated</b> | <b>With intact capsules,<br/>non-irradiated</b> | 0.6624   |           |  |  |      |
| 39.30±3.58                                      | 38.13±2.43                                      |          |           |  |  |      |

**Table S6.** Viability of non-irradiated HeLa cells treated with 1 or 5 capsules per cell (for Figure 7b). Each point indicates the mean± (n=6). Both intact and heated Cholosens loaded PMC displayed significantly lower non-irradiated toxicity to HeLa cells compared to Cholosens solution (p<0.01).

| <i>HeLa, 1 capsules/cell</i>         |                                       |         |    |                   |                    |        |
|--------------------------------------|---------------------------------------|---------|----|-------------------|--------------------|--------|
| With heated capsules, non-irradiated | In Cholosens solution, non-irradiated | t       | df | t crit (* p<0.05) | t crit (** p<0.01) | result |
| 93,18±2,19                           | 75,30±0,65                            | 19.1719 | 10 | 2,2281            | 3,1693             | **     |
| With intact capsules, non-irradiated | In Cholosens solution, non-irradiated | 26.6966 |    |                   |                    | **     |
| 99,78±2,15                           | 75,30±0,65                            |         |    |                   |                    |        |
| <i>HeLa, 5 capsules/cell</i>         |                                       |         |    |                   |                    |        |
| With heated capsules, non-irradiated | In Cholosens solution, non-irradiated |         |    |                   |                    | **     |
| 89,18±2,69                           | 61,32±0,70                            | 24.5514 |    |                   |                    | **     |
| With intact capsules, non-irradiated | In Cholosens solution, non-irradiated | 41.1840 |    |                   |                    |        |
| 105.78±2.55                          | 61.32±0.70                            |         |    |                   |                    |        |

2.3. Student's test results for light and dark viability of bacterial cells depending on the number of Cholosens-loaded capsules (intact or heated) added to the culture medium

**Table S7.** Viability of gram-positive *S. aureus* bacterial cells, %. Each point indicates the mean± (n=6).

| <i>3 capsules/cell</i>                |                                      |         |    |                   |                    |        |
|---------------------------------------|--------------------------------------|---------|----|-------------------|--------------------|--------|
| With heated capsules, irradiated      | With intact capsules, irradiated     | t       | df | t crit (* p<0.05) | t crit (** p<0.01) | result |
| 37.5±3.115                            | 25±3.129                             | 6.9348  | 10 | 2.2281            | 3.1693             | **     |
| In Cholosens solution, irradiated     | With intact capsules, irradiated     |         |    |                   |                    | **     |
| 7±3,115                               | 25±3,129                             | 9.9862  |    |                   |                    | **     |
| In Cholosens solution, irradiated     | With heated capsules, irradiated     |         |    |                   |                    | **     |
| 7±3.115                               | 37.5±3.115                           | 16.9591 |    |                   |                    | **     |
| With heated capsules, non-irradiated  | With intact capsules, non-irradiated |         |    |                   |                    | **     |
| 82±4.115                              | 69.7±6.115                           | 4.0877  |    |                   |                    | **     |
| In Cholosens solution, non-irradiated | With intact capsules, non-irradiated |         |    |                   |                    | **     |
| 29±3.115                              | 69.7±6.115                           | 14.5270 |    |                   |                    | **     |
| In Cholosens solution, non-irradiated | With heated capsules, non-irradiated |         | ** |                   |                    |        |
| 29±3.115                              | 82±4.115                             | 25.1544 |    |                   |                    |        |
| <i>9 capsules/cell</i>                |                                      |         |    |                   |                    |        |
| With heated capsules, irradiated      | With intact capsules, irradiated     | t       |    |                   |                    |        |
| 7.8±2.264                             | 5.6±2.078                            | 1.7536  |    |                   |                    | n.s.   |
| In Cholosens solution, irradiated     | With intact capsules, irradiated     |         |    |                   |                    |        |
| 3.05±1.864                            | 5.6±2.078                            | 2.2376  |    |                   |                    | *      |
| In Cholosens solution, irradiated     | With heated capsules, irradiated     |         |    |                   |                    |        |
| 3.05±1.864                            | 7.8±2.264                            | 3.9675  |    |                   |                    | **     |
| With heated capsules, non-irradiated  | With intact capsules, non-irradiated |         |    |                   |                    |        |
| 63±3.864                              | 51±3.864                             | 5.3790  |    |                   |                    | **     |
| In Cholosens solution, non-irradiated | With intact capsules, non-irradiated |         |    |                   |                    |        |
| 11±2.164                              | 51±3.864                             | 17.9301 |    |                   |                    | **     |
| In Cholosens solution, non-irradiated | With heated capsules, non-irradiated |         |    |                   |                    |        |

|                                              |                                             |          |  |  |  |      |
|----------------------------------------------|---------------------------------------------|----------|--|--|--|------|
| 11±2.164                                     | 63±3.864                                    | 28.7609  |  |  |  | **   |
| <i>18 capsules/cell</i>                      |                                             |          |  |  |  |      |
| <b>With heated capsules, irradiated</b>      | <b>With intact capsules, irradiated</b>     | <b>t</b> |  |  |  |      |
| 5.75±1.6675                                  | 4.25±2.1825                                 | 1.3377   |  |  |  | n.s. |
| <b>In Cholosens solution, irradiated</b>     | <b>With intact capsules, irradiated</b>     |          |  |  |  |      |
| 1.875±1.0175                                 | 4.25±2.1825                                 | 2.4159   |  |  |  | *    |
| <b>In Cholosens solution, irradiated</b>     | <b>With heated capsules, irradiated</b>     |          |  |  |  |      |
| 1.875±1.0175                                 | 5.75±1.6675                                 | 4.8590   |  |  |  | **   |
| <b>With heated capsules, non-irradiated</b>  | <b>With intact capsules, non-irradiated</b> |          |  |  |  |      |
| 51±3.1675                                    | 44±3.1675                                   | 3.8277   |  |  |  | **   |
| <b>In Cholosens solution, non-irradiated</b> | <b>With intact capsules, non-irradiated</b> |          |  |  |  |      |
| 6±0.99                                       | 44±3.1675                                   | 28.0481  |  |  |  | **   |
| <b>In Cholosens solution, non-irradiated</b> | <b>With heated capsules, non-irradiated</b> |          |  |  |  |      |
| 6±0.99                                       | 51±3.1675                                   | 33.2148  |  |  |  | **   |
| <i>27 capsules/cell</i>                      |                                             |          |  |  |  |      |
| <b>With heated capsules, irradiated</b>      | <b>With intact capsules, irradiated</b>     | <b>t</b> |  |  |  |      |
| 1.6±0.898                                    | 0±1.31                                      | 2.4676   |  |  |  | *    |
| <b>In Cholosens solution, irradiated</b>     | <b>With intact capsules, irradiated</b>     |          |  |  |  |      |
| 0±1.298                                      | 0±1.31                                      | 0        |  |  |  | n.s. |
| <b>In Cholosens solution, irradiated</b>     | <b>With heated capsules, irradiated</b>     |          |  |  |  |      |
| 0±1.298                                      | 1.6±0.898                                   | 2.4831   |  |  |  | *    |
| <b>With heated capsules, non-irradiated</b>  | <b>With intact capsules, non-irradiated</b> |          |  |  |  |      |
| 43±3.898                                     | 33±4.398                                    | 4.1681   |  |  |  | **   |
| <b>In Cholosens solution, non-irradiated</b> | <b>With intact capsules, non-irradiated</b> |          |  |  |  |      |
| 0±0.898                                      | 33±4.398                                    | 18.0080  |  |  |  | **   |
| <b>In Cholosens solution, non-irradiated</b> | <b>With heated capsules, non-irradiated</b> |          |  |  |  |      |
| 0±0.898                                      | 43±3.898                                    | 26.3313  |  |  |  | **   |

Table S8. Viability of gram-negative E. coli, %. Each point indicates the mean± (n=6).

|                                              |                                             |          |           |                             |                              |               |
|----------------------------------------------|---------------------------------------------|----------|-----------|-----------------------------|------------------------------|---------------|
| <i>5 capsules/cell</i>                       |                                             |          |           |                             |                              |               |
| <b>With heated capsules, irradiated</b>      | <b>With intact capsules, irradiated</b>     | <b>t</b> | <b>df</b> | <b>t crit (* p&lt;0.05)</b> | <b>t crit (** p&lt;0.01)</b> | <b>result</b> |
| 81.65066±5.08253                             | 68.39813±5.08253                            | 4.5163   | 10        | 2.2281                      | 3.1693                       | **            |
| <b>In Cholosens solution, irradiated</b>     | <b>With intact capsules, irradiated</b>     |          |           |                             |                              | **            |
| 39.22372±5.08253                             | 68.39813±5.08253                            | 9.9422   |           |                             |                              | **            |
| <b>In Cholosens solution, irradiated</b>     | <b>With heated capsules, irradiated</b>     |          |           |                             |                              | **            |
| 39.22372±5.08253                             | 81.65066±5.08253                            | 14.4585  |           |                             |                              | n.s.          |
| <b>With heated capsules, non-irradiated</b>  | <b>With intact capsules, non-irradiated</b> |          |           |                             |                              | **            |
| 95.06878±3.08253                             | 93.49001±4.08253                            | 0.7560   |           |                             |                              | **            |
| <b>In Cholosens solution, non-irradiated</b> | <b>With intact capsules, non-irradiated</b> |          |           |                             |                              | **            |
| 77.36143±4.08253                             | 93.49001±4.08253                            | 6.8427   |           |                             |                              | **            |
| <b>In Cholosens solution, non-irradiated</b> | <b>With heated capsules, non-irradiated</b> |          |           |                             |                              | **            |
| 77.36143±4.08253                             | 95.06878±3.08253                            | 8.4788   |           |                             |                              |               |
| <i>10 capsules/cell</i>                      |                                             |          |           |                             |                              |               |
| <b>With heated capsules,</b>                 | <b>With intact capsules,</b>                | <b>t</b> |           |                             |                              |               |



|                                              |                                             |          |  |  |               |
|----------------------------------------------|---------------------------------------------|----------|--|--|---------------|
| <b>irradiated</b>                            | <b>irradiated</b>                           |          |  |  |               |
| 72.22943±4.08253                             | 54.58033±6.08253                            | 5.9014   |  |  | **            |
| <b>In Cholosens solution, irradiated</b>     | <b>With intact capsules, irradiated</b>     |          |  |  |               |
| 34.82715±4.08253                             | 54.58033±6.08253                            | 6.6050   |  |  | **            |
| <b>In Cholosens solution, irradiated</b>     | <b>With heated capsules, irradiated</b>     |          |  |  |               |
| 34.82715±4.08253                             | 72.22943±4.08253                            | 15.8683  |  |  | **            |
| <b>With heated capsules, non-irradiated</b>  | <b>With intact capsules, non-irradiated</b> |          |  |  |               |
| 91.98547±4.08253                             | 86.29847±4.08253                            | 2.4128   |  |  | *             |
| <b>In Cholosens solution, non-irradiated</b> | <b>With intact capsules, non-irradiated</b> |          |  |  |               |
| 67.70496±4.61147                             | 86.29847±4.08253                            | 7.3949   |  |  | **            |
| <b>In Cholosens solution, non-irradiated</b> | <b>With heated capsules, non-irradiated</b> |          |  |  |               |
| 67.70496±4.61147                             | 91.98547±4.08253                            | 9.6567   |  |  | **            |
| <i>20 capsules/cell</i>                      |                                             |          |  |  |               |
| <b>With heated capsules, irradiated</b>      | <b>With intact capsules, irradiated</b>     | <b>t</b> |  |  | <b>result</b> |
| 47.62523±6.08253                             | 32.59798±5.58253                            | 4.4585   |  |  | **            |
| <b>In Cholosens solution, irradiated</b>     | <b>With intact capsules, irradiated</b>     |          |  |  |               |
| 25.66831±5.08253                             | 32.59798±5.58253                            | 2.2483   |  |  | *             |
| <b>Cholosens solution irradiated</b>         | <b>With heated capsules, irradiated</b>     |          |  |  |               |
| 25.66831±5.08253                             | 47.62523±6.08253                            | 6.7853   |  |  | **            |
| <b>With heated capsules, non-irradiated</b>  | <b>With intact capsules, non-irradiated</b> |          |  |  |               |
| 84.26291±6.08253                             | 59.43421±6.08253                            | 7.0702   |  |  | **            |
| <b>In Cholosens solution, non-irradiated</b> | <b>With intact capsules, non-irradiated</b> |          |  |  |               |
| 51.49234±6.38126                             | 59.43421±6.08253                            | 2.2067   |  |  | n.s.          |
| <b>In Cholosens solution, non-irradiated</b> | <b>With heated capsules, non-irradiated</b> |          |  |  |               |
| 51.49234±6.38126                             | 84.26291±6.08253                            | 9.1054   |  |  | **            |
| <i>80 capsules/cell</i>                      |                                             |          |  |  |               |
| <b>With heated capsules, irradiated</b>      | <b>With intact capsules, irradiated</b>     | <b>t</b> |  |  |               |
| 28.15988±5.425                               | 3.3132±1.11601                              | 10.4210  |  |  | **            |
| <b>In Cholosens solution, irradiated</b>     | <b>With intact capsules, irradiated</b>     |          |  |  |               |
| 0.59694±4.08253                              | 1.11601±3.3132                              | 0.2418   |  |  | n.s.          |
| <b>Cholosens solution irradiated</b>         | <b>With heated capsules, irradiated</b>     |          |  |  |               |
| 0.59694±4.08253                              | 28.15988±5.425                              | 9.9440   |  |  | **            |
| <b>With heated capsules, non-irradiated</b>  | <b>With intact capsules, non-irradiated</b> |          |  |  |               |
| 87.28108±8.08253                             | 58.13652±8.08253                            | 6.2456   |  |  | **            |
| <b>In Cholosens solution, non-irradiated</b> | <b>With intact capsules, non-irradiated</b> |          |  |  |               |

|                                                 |                                                  |        |  |  |  |      |
|-------------------------------------------------|--------------------------------------------------|--------|--|--|--|------|
| 51.1809±7.311                                   | 58.13652±8.08253                                 | 1.5633 |  |  |  | n.s. |
| <b>In Cholosen solution,<br/>non-irradiated</b> | <b>With heated capsules, non-<br/>irradiated</b> |        |  |  |  |      |
| 51.1809±7.311                                   | 87.28108±8.0825                                  | 8.1137 |  |  |  | **   |

**Table S9.** The difference in viability of gram-positive *S. aureus* and gram-negative *E. coli*. (%) at different doses of capsules per cell

| <i>S. aureus, With heated capsules, irradiated</i>     |                  |         |    |                      |                       |        |
|--------------------------------------------------------|------------------|---------|----|----------------------|-----------------------|--------|
| 3 capsules/cell                                        | 9 capsules/cell  | t       | df | t crit (*<br>p<0.05) | t crit (**<br>p<0.01) | result |
| 37.5±3.115                                             | 7.8±2.264        | 18.8920 | 10 | 2,2281               | 3,1693                | **     |
| <i>S. aureus, With heated capsules, non-irradiated</i> |                  |         |    |                      |                       |        |
| 3 capsules/cell                                        | 9 capsules/cell  | t       | df | t crit (*<br>p<0.05) | t crit (**<br>p<0.01) | result |
| 82±4.115                                               | 63±3.864         | 8.2448  |    |                      |                       | **     |
| <i>S. aureus, With intact capsules, irradiated</i>     |                  |         |    |                      |                       |        |
| 3 capsules/cell                                        | 9 capsules/cell  | t       | df | t crit (*<br>p<0.05) | t crit (**<br>p<0.01) | result |
| 25±3.129                                               | 5.6±2.078        | 12.6513 |    |                      |                       | **     |
| <i>S. aureus, With intact capsules, non-irradiated</i> |                  |         |    |                      |                       |        |
| 3 capsules/cell                                        | 9 capsules/cell  | t       | df | t crit (*<br>p<0.05) | t crit (**<br>p<0.01) | result |
| 69.7±6.115                                             | 51±3.864         | 6.3324  |    |                      |                       | **     |
| <i>S. aureus, in Cholosen solution, irradiated</i>     |                  |         |    |                      |                       |        |
| 3 capsules/cell                                        | 9 capsules/cell  | t       | df | t crit (*<br>p<0.05) | t crit (**<br>p<0.01) | result |
| 7±3.115                                                | 3.05±1.864       | 2.6653  |    |                      |                       | *      |
| <i>S. aureus, in Cholosen solution, non-irradiated</i> |                  |         |    |                      |                       |        |
| 3 capsules/cell                                        | 9 capsules/cell  | t       | df | t crit (*<br>p<0.05) | t crit (**<br>p<0.01) | result |
| 29±3.115                                               | 11±2.164         | 11.6246 |    |                      |                       | **     |
| <i>E. coli., with heated capsules, irradiated</i>      |                  |         |    |                      |                       |        |
| 10 capsules/cell                                       | 20 capsules/cell | t       | df | t crit (*<br>p<0.05) | t crit (**<br>p<0.01) | result |
| 72.22943±4.08253                                       | 47.62523±6.08253 | 8.2270  |    |                      |                       | **     |
| <i>E. coli., with heated capsules, non-irradiated</i>  |                  |         |    |                      |                       |        |
| 10 capsules/cell                                       | 20 capsules/cell | t       | df | t crit (*<br>p<0.05) | t crit (**<br>p<0.01) | result |
| 91.98547±4.08253                                       | 84.26291±6.08253 | 2.5822  |    |                      |                       | *      |
| <i>E. coli., with intact capsules, irradiated</i>      |                  |         |    |                      |                       |        |
| 10 capsules/cell                                       | 20 capsules/cell | t       | df | t crit (*<br>p<0.05) | t crit (**<br>p<0.01) | result |
| 54.58033±6.08253                                       | 32.59798±5.58253 | 6.5220  |    |                      |                       | **     |
| <i>E. coli., with intact capsules, non-irradiated</i>  |                  |         |    |                      |                       |        |
| 10 capsules/cell                                       | 20 capsules/cell | t       | df | t crit (*<br>p<0.05) | t crit (**<br>p<0.01) | result |
| 86.29847±4.08253                                       | 59.43421±6.08253 | 8.9827  |    |                      |                       | **     |
| <i>E. coli., in Cholosen solution, irradiated</i>      |                  |         |    |                      |                       |        |
| 10 capsules/cell                                       | 20 capsules/cell | t       | df | t crit (*<br>p<0.05) | t crit (**<br>p<0.01) | result |
| 34.82715±4.08253                                       | 25.66831±5.08253 | 3.4413  |    |                      |                       | **     |
| <i>E. coli., in Cholosen solution, non-irradiated</i>  |                  |         |    |                      |                       |        |
| 10 capsules/cell                                       | 20 capsules/cell | t       | df | t crit (*<br>p<0.05) | t crit (**<br>p<0.01) | result |
| 67.70496±4.61147                                       | 51.49234±6.38126 | 5.0441  |    |                      |                       | **     |

**Table S10.** IC50 for HeLa and NHDF cells

| <i>Irradiated</i>     |                     |                     |                     |                     |                            |                     |
|-----------------------|---------------------|---------------------|---------------------|---------------------|----------------------------|---------------------|
| Cell type             | Intact capsules     |                     | Heated capsules     |                     | Free Cholosens             |                     |
|                       | cap per cell        | m[Cholosens],<br>pg | cap per cell        | m[Cholosens],<br>pg | cap per cell<br>equivalent | m[Cholosens],<br>pg |
| HeLa                  | 3.25                | 2.9                 | 3.73                | 3.4                 | 2.89                       | 2.6                 |
| NHDF                  | 3.1                 | 2.8                 | 3.2                 | 2.88                | 2.64                       | 2.4                 |
| <i>Non-irradiated</i> |                     |                     |                     |                     |                            |                     |
| Cell type             | Intact capsules     |                     | Heated capsules     |                     | Free Cholosens             |                     |
|                       | cap per cell        | m[Cholosens],<br>pg | cap per cell        | m[Cholosens],<br>pg | cap per cell<br>equivalent | m[Cholosens],<br>pg |
| HeLa                  | Not<br>established* | Not<br>established* | Not<br>established* | Not<br>established* | 9.1                        | 8.2                 |
| NHDF                  | 16,91               | 15,2                | 29.87               | 26.9                | 13.6                       | 12.2                |

\* The cell viability never drops below 50%

**Table S11.** IC50 for *S. aureus* and *E. Coli*

| <i>Irradiated</i>     |                 |                     |                 |                     |                            |                      |
|-----------------------|-----------------|---------------------|-----------------|---------------------|----------------------------|----------------------|
| Cell type             | Intact capsules |                     | Heated capsules |                     | Free Cholosens             |                      |
|                       | cap per cell    | m[Cholosens],<br>pg | cap per cell    | m[Cholosens],<br>pg | cap per cell<br>equivalent | m[Cholosens],<br>pg  |
| <i>S. aureus</i>      | 0.85            | 0.77                | 0.94            | 0.846               | Not<br>established**       | Not<br>established** |
| <i>E. Coli</i>        | 12.2            | 10.8                | 17.1            | 26.9                | Not<br>established**       | Not<br>established** |
| <i>Non-irradiated</i> |                 |                     |                 |                     |                            |                      |
| Cell type             | Intact capsules |                     | Heated capsules |                     | Free Cholosens             |                      |
|                       | cap per cell    | m[Cholosens],<br>pg | cap per cell    | m[Cholosens],<br>pg | cap per cell<br>equivalent | m[Cholosens],<br>pg  |
| <i>S. aureus</i>      | 10.3            | 0.9                 | 19.13           | 0.9                 | Not<br>established**       | Not<br>established** |
| <i>E. Coli</i>        | 493***          | 443.7***            | 636***          | 572.4***            | 316***                     | 284.4***             |

\*\* The cell viability drops below 50%

\*\*\* Not practicable
